# Supplementary material
Source: PubMed Central journal article supplement (PMC2741587)
Supplement: mmc1.pdf [file mmc1.pdf]

Biophysical Journal, Volume 97

**Supporting Material**

**Changes in the Electrostatic Surface Potential of the Na<sup>+</sup>/K<sup>+</sup>-ATPase Cytoplasmic Headpiece Induced by the Cytoplasmic Ligand(s) Binding**

Martin Kubala, Lenka Grycova, Zdenek Lansky, Petr Sklenovsky, Marika Janovska, Michal Otyepka, and Jan Teisinger

## Supplementary material to the manuscript of Kubala et al.

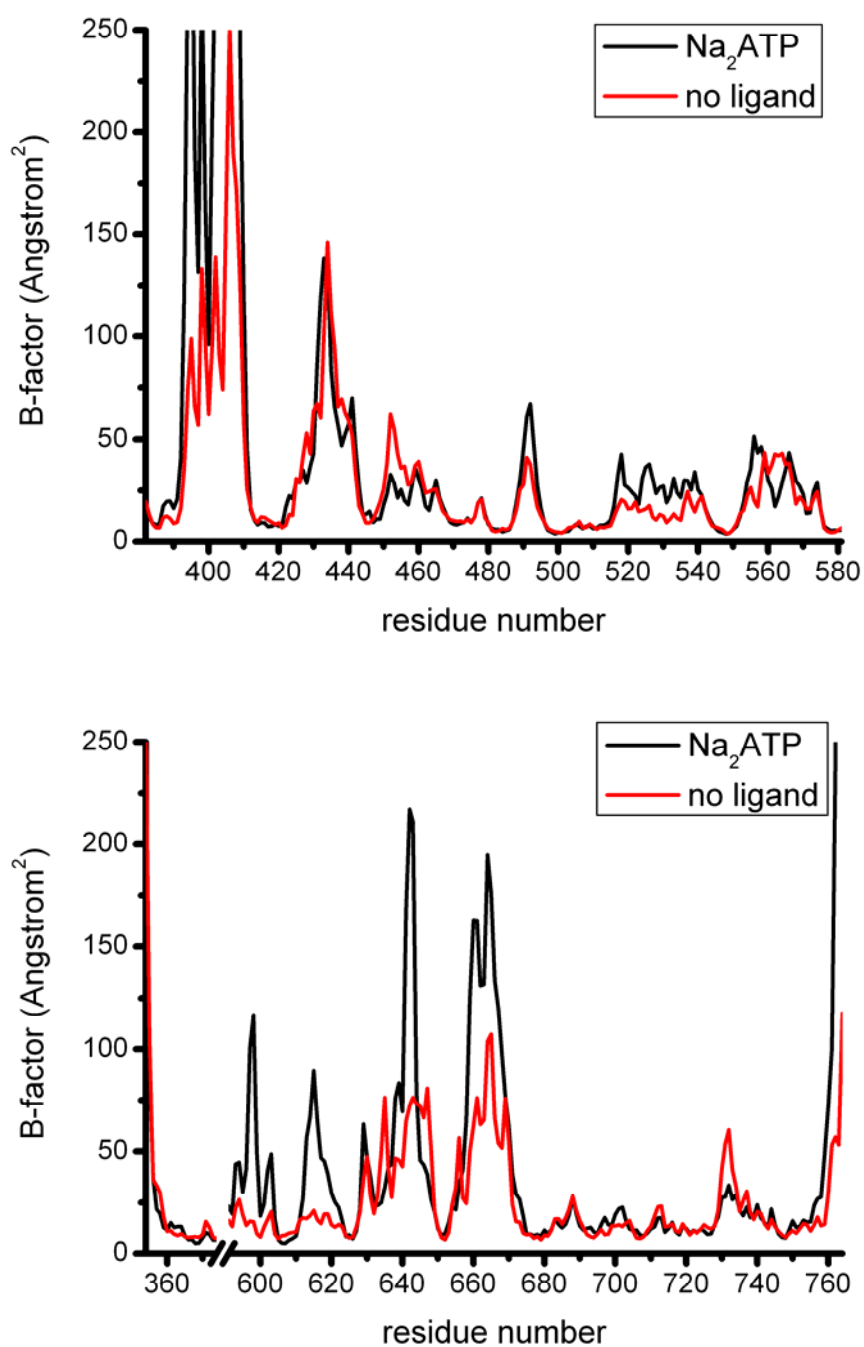

Fig. S1.

The flexibility of residues within N-domain (top) and P-domain (bottom) has been monitored using temperature B-factors and was calculated for the backbone atoms from the last 2 ns of each simulation using the PTRAJ utility of AMBER.
